# Supplementary material for: Synthesis of an inositol hexakisphosphate (IP6) affinity probe to study the interactome from a colon cancer cell line
Source: Royal Society of Chemistry journal article supplement (doi:10.1039/c5ib00264h), 2016-01-01

## **INTERACTION NETWORKS**

### **IP6(phytate)/Beta-arrestin**

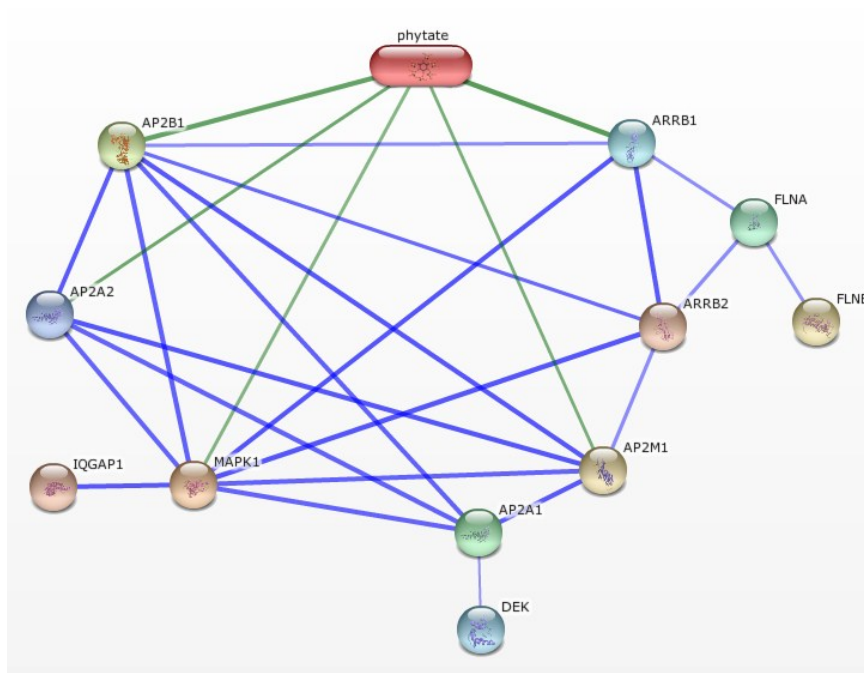

### **Spliceosome**

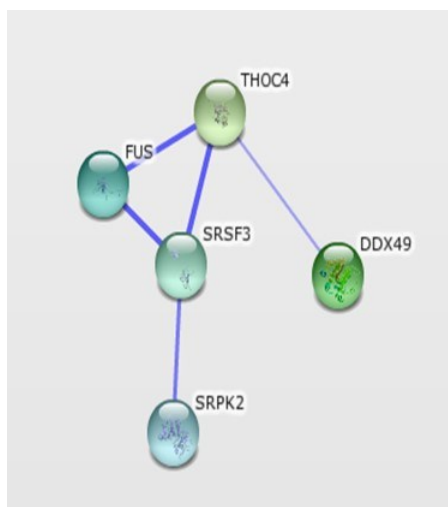

### **Phosphatidylinositol Phosphate**

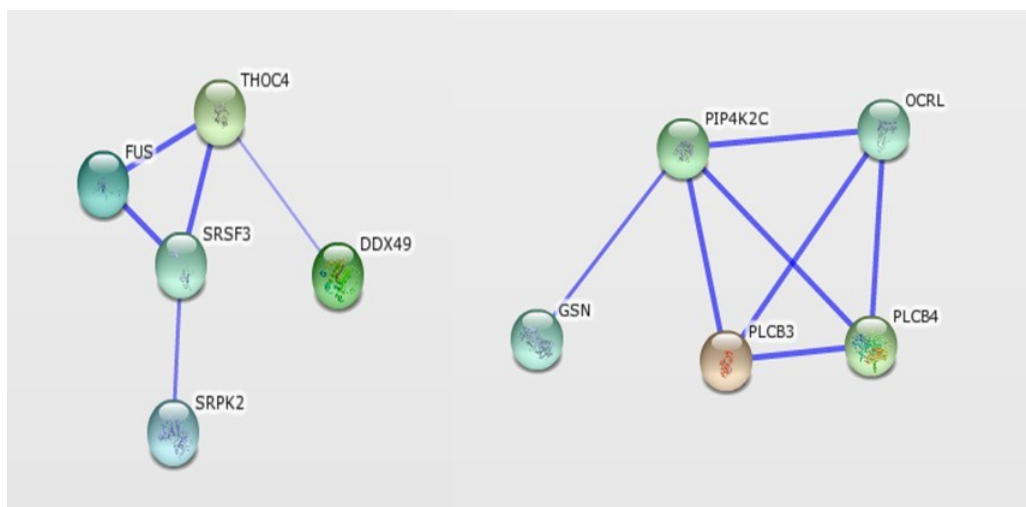

### **Septins**

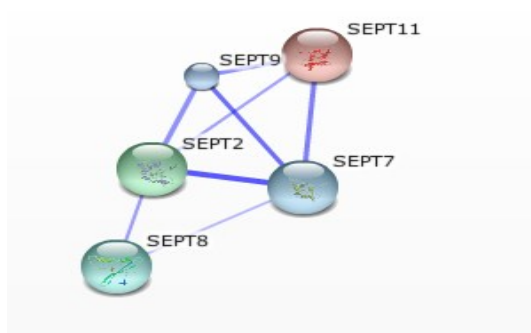

Supplement: c5ib00264h7.pdf [file c5ib00264h7.pdf]
